# Supplementary material for: Nationwide Surveillance of Antifungal Resistance of Candida Bloodstream Isolates in South Korean Hospitals: Two Year Report from Kor-GLASS
Source: MDPI journal article supplement (doi:10.3390/jof8100996), 2022-09-22
Supplement: s1 [file s1]

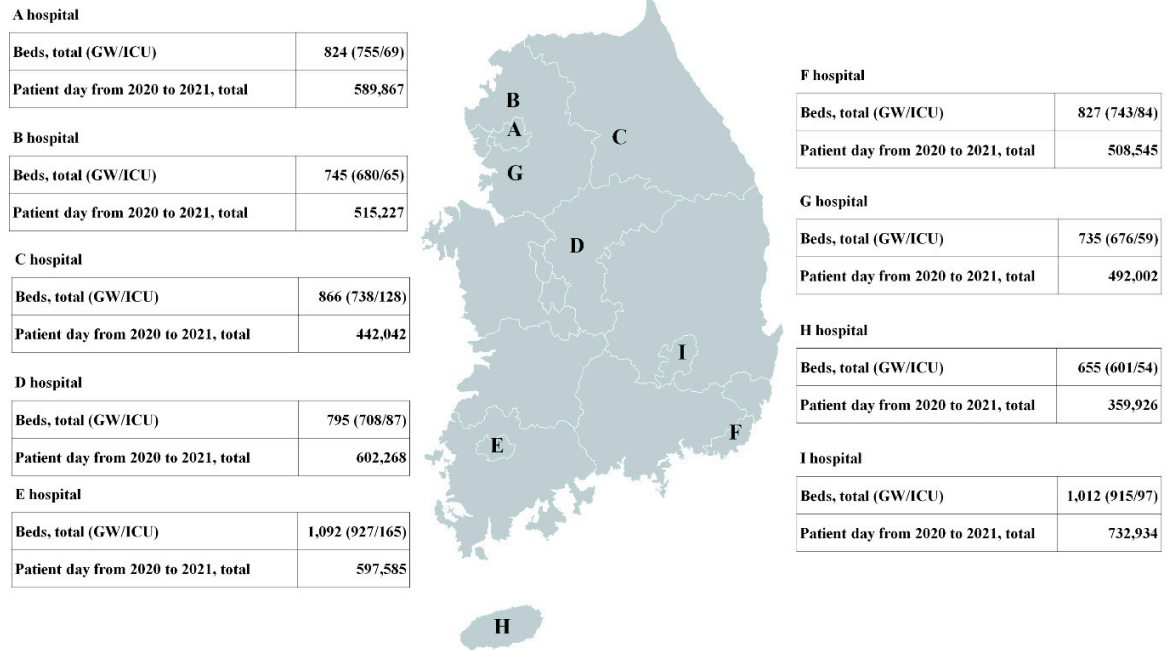

**Figure S1.** Distribution of the collection centers of the Kor-GLASS surveillance system in South Korea, the number of beds, and the days of hospitalization during 2020–2021. Abbreviations: GW, general ward; ICU, intensive care unit.
